# Supplementary material
Source: PubMed Central journal article supplement (PMC3400541)
Supplement: supp_blood-2007-10-120832_TableS1.pdf [file supp_blood-2007-10-120832_TableS1.pdf]

---

| <i>wild-type</i> | <i>nfkb1<sup>-/-</sup></i> | <i>bim<sup>-/-</sup></i> | <i>nfkb1<sup>-/-</sup>bim<sup>-/-</sup></i> | <i>bcl2<sup>T</sup></i> | <i>nfkb1<sup>-/-</sup>bcl2<sup>T</sup></i> |
|------------------|----------------------------|--------------------------|---------------------------------------------|-------------------------|--------------------------------------------|
| 110              | 135                        | 355                      | 384                                         | 324                     | 620                                        |

---
